# Supplementary material
Source: Royal Society of Chemistry journal article supplement (doi:10.1039/d6nj00525j)
Supplement: d6nj00525j1.pdf [file d6nj00525j1.pdf]

**Insights into the influence of in situ generated H<sub>2</sub> and H<sub>2</sub>O on the stability of highly dispersed CuO-  
ZnO/SiO<sub>2</sub> Catalyst**

Chengfei Zhang <sup>a</sup>, Pengze Zhang <sup>b\*</sup>, Mingyuan Zhu <sup>a\*</sup>

<sup>a</sup> *School of Chemistry & Chemical Engineering, Yantai University, Yantai, Shandong, 264010, P. R. China.*

<sup>b</sup> *School of Materials and Chemical Engineering, Ningbo University of Technology, Ningbo, 315211, P. R. China.*

Corresponding Authors: pengzezhang@nbut.edu.cn, and [myzhu@ytu.edu.cn](mailto:myzhu@ytu.edu.cn).

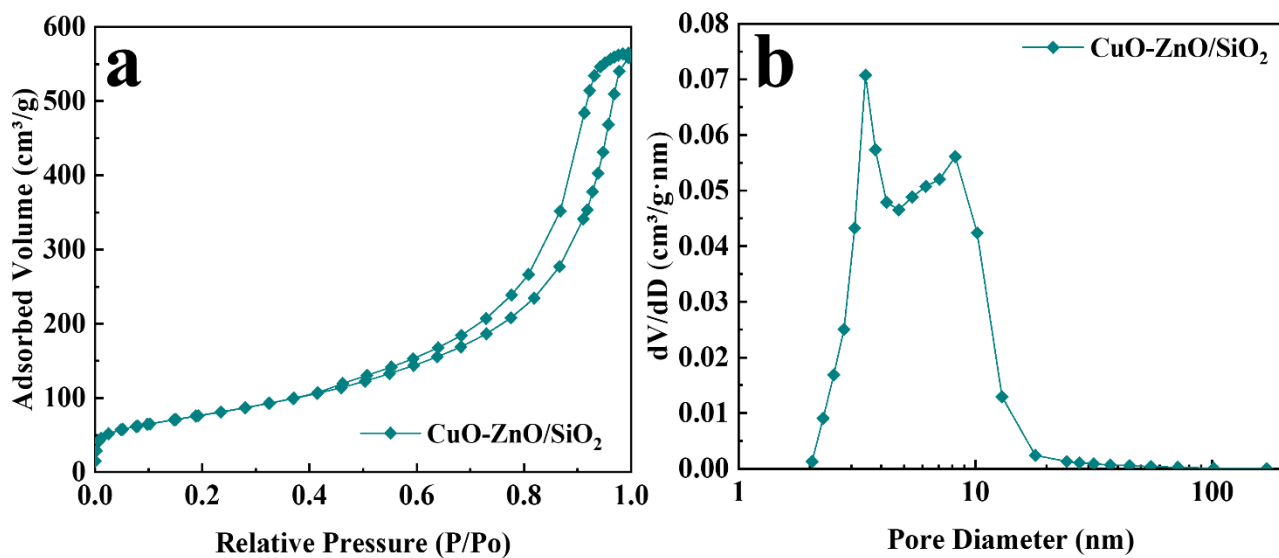

**Figure S1.** (a) The N<sub>2</sub> adsorption-desorption isotherm for CuO-ZnO/SiO<sub>2</sub>. (b) The pore size distribution curve for CuO-ZnO/SiO<sub>2</sub>.

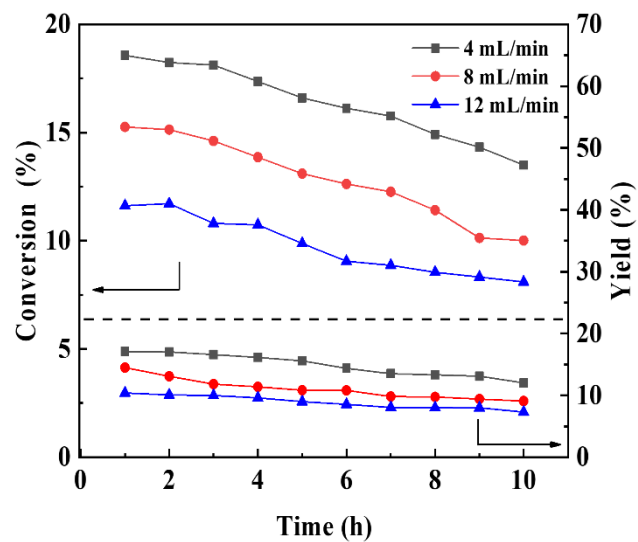

**Figure S2.** The catalytic performance of CuO-ZnO/SiO<sub>2</sub> at WHSV (C<sub>3</sub>H<sub>9</sub>ON) = 75 h<sup>-1</sup> and T = 250 °C.

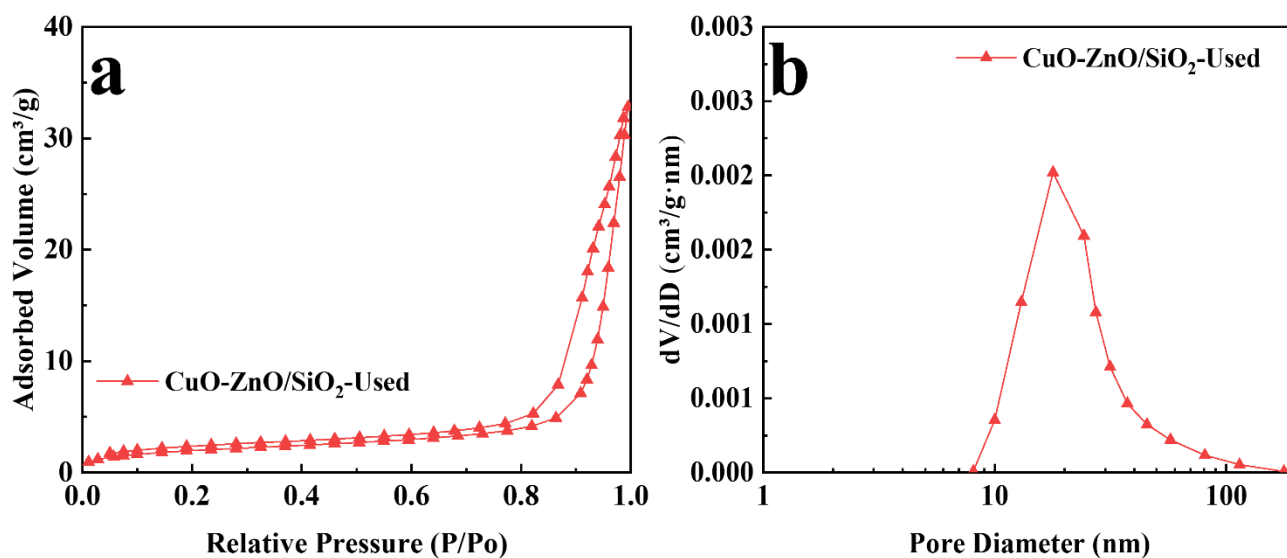

**Figure S3.** (a) The N<sub>2</sub> adsorption-desorption isotherm for CuO-ZnO/SiO<sub>2</sub>-Used. (b) The pore size distribution curve for CuO-ZnO/SiO<sub>2</sub>-Used.

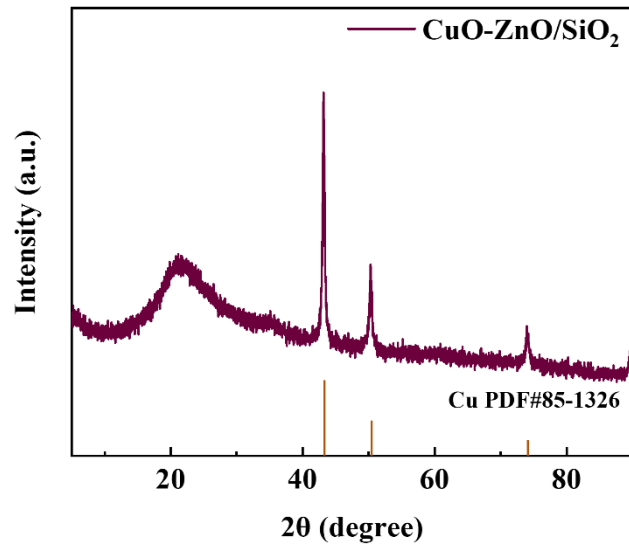

**Figure S4.** The XRD patterns of CuO-ZnO/SiO<sub>2</sub>.

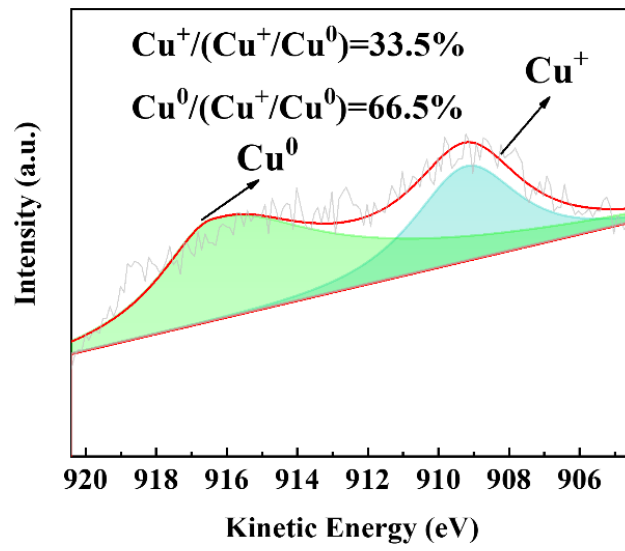

**Figure S5.** Cu LMM of XPS for CuO-ZnO/SiO<sub>2</sub>-Regenerated.

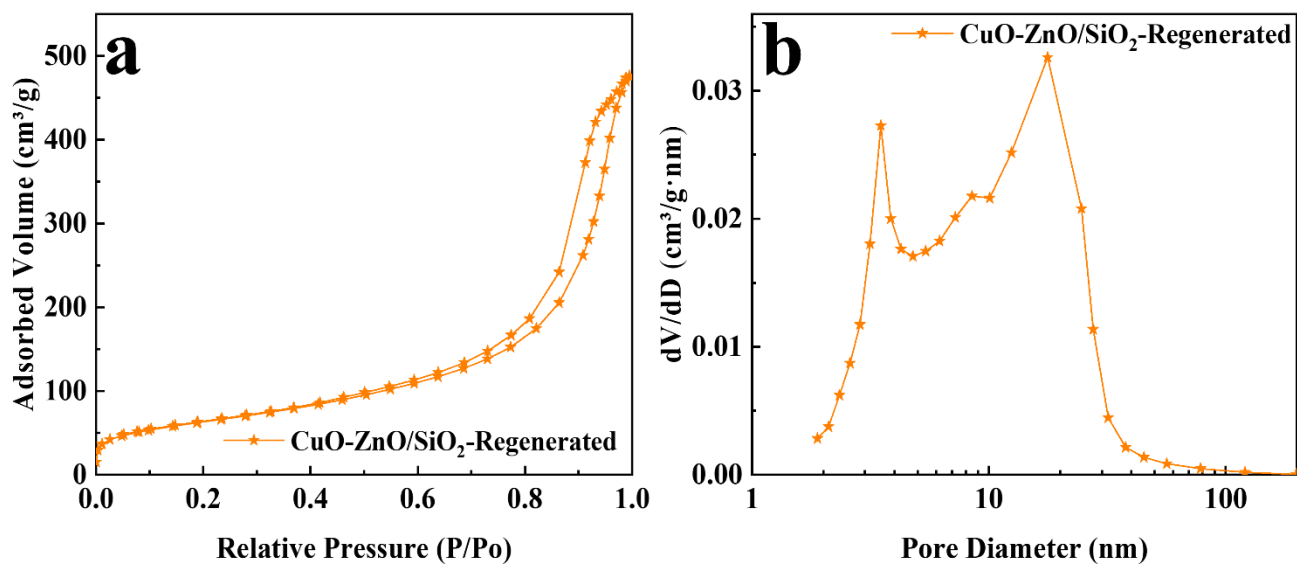

**Figure S6.** (a) The N<sub>2</sub> adsorption-desorption isotherm for CuO-ZnO/SiO<sub>2</sub>-Regenerated. (b) The pore size distribution curve for CuO-ZnO/SiO<sub>2</sub>-Regenerated.
